# Supplementary material for: Investigation of factors affecting the stability of compounds formed by isovalent substitution in layered oxychalcogenides, leading to identification of Ba3Sc2O5Cu2Se2, Ba3Y2O5Cu2S2, Ba3Sc2O5Ag2Se2 and Ba3In2O5Ag2Se2
Source: Royal Society of Chemistry journal article supplement (doi:10.1039/d1tc05051f), 2022-01-01
Supplement: d1tc05051f1.pdf [file d1tc05051f1.pdf]

## ELECTRONIC SUPPLEMENTARY INFORMATION

### Investigation of Factors Affecting the Stability of Compounds Formed by Isovalent Substitution in Layered Oxychalcogenides, Leading to Identification of $\text{Ba}_3\text{Sc}_2\text{O}_5\text{Cu}_2\text{Se}_2$ , $\text{Ba}_3\text{Y}_2\text{O}_5\text{Cu}_2\text{Se}_2$ , $\text{Ba}_3\text{Sc}_2\text{O}_5\text{Ag}_2\text{Se}_2$ and $\text{Ba}_3\text{In}_2\text{O}_5\text{Ag}_2\text{Se}_2$ .

[Please note: this document was updated 20th November 2023, to amend a typographical error  
appearing in one of the formulae in the title]

Gregory J. Limburn<sup>a</sup>, Daniel W. Davies<sup>b,c</sup>, Neil Langridge<sup>a</sup>, Zahida Malik<sup>a</sup>, Benjamin A. D.  
Williamson<sup>c</sup>, David O. Scanlon<sup>b</sup>, Geoffrey Hyett<sup>a\*</sup>

<sup>a</sup> School of Chemistry, University of Southampton, Southampton, SO17 1BJ, UK

<sup>b</sup> Department of Chemistry, University College London, 20 Gordon Street, London, WC1H 0AJ, UK

<sup>c</sup> Research Computing Service, Information and Communication Technology, Imperial College London, London, SW7 2AZ, UK.

<sup>d</sup> Department of Materials Science and Engineering, Norwegian University of Science and Technology (NTNU), Trondheim 7491, Norway

\*Corresponding Author: g.hyett@soton.ac.uk

---

---

|    | Formula                                           | $\Delta H_f$ / eV | Formula                                                        | $\Delta H_f$ / eV | Formula                                            | $\Delta H_f$ / eV |
|----|---------------------------------------------------|-------------------|----------------------------------------------------------------|-------------------|----------------------------------------------------|-------------------|
| 0  | CuS                                               | -3.44547          | Se                                                             | -3.8054           | BaSe <sub>2</sub>                                  | -4.67216          |
| 1  | Ba(Ag <sub>3</sub> O <sub>2</sub> ) <sub>2</sub>  | -3.61945          | La <sub>10</sub> Si <sub>14</sub> O                            | -7.15085          | In                                                 | -2.98475          |
| 2  | Ba <sub>2</sub> Y(CuO <sub>2</sub> ) <sub>4</sub> | -5.93288          | Cu                                                             | -2.59161          | Y <sub>2</sub> (SO <sub>4</sub> ) <sub>3</sub>     | -7.49282          |
| 3  | BaScCuS <sub>3</sub>                              | -5.7897           | Sc <sub>2</sub> Se <sub>3</sub> O <sub>10</sub>                | -6.86857          | Y <sub>2</sub> S <sub>3</sub>                      | -7.49454          |
| 4  | CuS <sub>2</sub>                                  | -3.97707          | In <sub>4</sub> Ag <sub>9</sub>                                | -2.10105          | LaCu <sub>2</sub>                                  | -3.6207           |
| 5  | Ba <sub>2</sub> LaAg <sub>5</sub> S <sub>6</sub>  | -4.29224          | Y <sub>2</sub> O <sub>3</sub>                                  | -9.51497          | BaIn <sub>2</sub>                                  | -3.23909          |
| 6  | LaCuO <sub>3</sub>                                | -6.76352          | ScSe                                                           | -6.89272          | Ba <sub>4</sub> InAgS <sub>6</sub>                 | -4.8908           |
| 7  | BaAg <sub>8</sub> S <sub>5</sub>                  | -3.10055          | AgSO <sub>4</sub>                                              | -5.4649           | LaS <sub>2</sub>                                   | -6.63879          |
| 8  | Ba <sub>11</sub> In <sub>6</sub> O <sub>3</sub>   | -3.91582          | BaLaCuS <sub>3</sub>                                           | -5.66111          | Ba <sub>2</sub> (CuO <sub>2</sub> ) <sub>3</sub>   | -5.3824           |
| 9  | ScCu <sub>2</sub>                                 | -4.09059          | CuSeO <sub>4</sub>                                             | -5.13146          | BaCu <sub>4</sub> S <sub>3</sub>                   | -3.98347          |
| 10 | Ba(AgS) <sub>2</sub>                              | -3.80156          | Ag <sub>2</sub> S                                              | -2.66386          | Ba(YSe) <sub>2</sub>                               | -6.95337          |
| 11 | Ba <sub>4</sub> Y(CuO <sub>3</sub> ) <sub>3</sub> | -6.19579          | Ag <sub>2</sub> S <sub>2</sub> O <sub>7</sub>                  | -5.50571          | Ag <sub>2</sub> SeO <sub>4</sub>                   | -4.55251          |
| 12 | La <sub>3</sub> CuS <sub>3</sub> O <sub>2</sub>   | -7.17984          | Y                                                              | -6.81909          | Ba(InS <sub>2</sub> ) <sub>2</sub>                 | -4.75879          |
| 13 | Sc <sub>2</sub> Se <sub>3</sub>                   | -6.67668          | ScCu                                                           | -4.77195          | Ba(InSe <sub>2</sub> ) <sub>2</sub>                | -4.37299          |
| 14 | Sc <sub>2</sub> SO <sub>2</sub>                   | -8.72514          | Se <sub>2</sub> O <sub>5</sub>                                 | -5.37804          | ScAgO <sub>2</sub>                                 | -7.00477          |
| 15 | CuO                                               | -4.34392          | LaSO                                                           | -7.68492          | In <sub>2</sub> O <sub>3</sub>                     | -5.96473          |
| 16 | BaSe                                              | -5.03127          | CuSe <sub>2</sub> O <sub>5</sub>                               | -5.25636          | LaCu <sub>5</sub>                                  | -3.12038          |
| 17 | InS                                               | -4.2109           | BaLaCuSe <sub>3</sub>                                          | -5.24417          | Y <sub>2</sub> Se <sub>3</sub>                     | -6.94221          |
| 18 | BaCu <sub>13</sub>                                | -2.54684          | Ba <sub>2</sub> In <sub>2</sub> S <sub>5</sub>                 | -4.90478          | La <sub>2</sub> SeO <sub>2</sub>                   | -8.13889          |
| 19 | BaS <sub>3</sub>                                  | -4.95371          | BaYCuSe <sub>3</sub>                                           | -5.4821           | La <sub>2</sub> SO <sub>6</sub>                    | -7.95241          |
| 20 | LaAg <sub>2</sub>                                 | -3.06689          | BaYAgSe <sub>3</sub>                                           | -5.28202          | O <sub>2</sub>                                     | -5.14269          |
| 21 | In <sub>2</sub> (SO <sub>4</sub> ) <sub>3</sub>   | -6.31404          | LaSO <sub>5</sub>                                              | -7.18884          | Ba <sub>2</sub> In <sub>2</sub> O <sub>5</sub>     | -6.12921          |
| 22 | BaIn <sub>4</sub>                                 | -3.21708          | Sc <sub>2</sub> S <sub>3</sub>                                 | -7.23503          | Ag                                                 | -1.64606          |
| 23 | LaCu <sub>13</sub>                                | -2.8278           | LaS                                                            | -7.09282          | LaSe                                               | -6.62074          |
| 24 | Sc <sub>2</sub> (SeO <sub>4</sub> ) <sub>3</sub>  | -6.67837          | BaCu                                                           | -2.38677          | BaO                                                | -6.20053          |
| 25 | Y <sub>5</sub> S <sub>7</sub>                     | -7.55252          | YAgSe <sub>2</sub>                                             | -5.30327          | La <sub>2</sub> Cu(SeO <sub>3</sub> ) <sub>4</sub> | -6.42915          |
| 26 | ScS                                               | -7.47639          | Ag <sub>2</sub> Se                                             | -2.54178          | LaCuSe <sub>2</sub>                                | -5.29228          |
| 27 | LaCuS <sub>2</sub>                                | -5.72764          | Ag <sub>3</sub> O <sub>4</sub>                                 | -3.69829          | S                                                  | -4.39088          |
| 28 | Ba <sub>3</sub> In <sub>2</sub> O <sub>6</sub>    | -6.15612          | La                                                             | -5.3462           | La <sub>10</sub> Si <sub>19</sub>                  | -6.70236          |
| 29 | BaCu(SeO <sub>3</sub> ) <sub>2</sub>              | -5.69116          | Ba <sub>2</sub> CuO <sub>3</sub>                               | -5.65774          | In <sub>2</sub> Se <sub>2</sub> O <sub>7</sub>     | -5.7523           |
| 30 | LaCuO <sub>2</sub>                                | -6.95227          | Sc <sub>2</sub> (SeO <sub>3</sub> ) <sub>3</sub>               | -6.95932          | Ba <sub>9</sub> In <sub>4</sub>                    | -2.70645          |
| 31 | LaCuSeO                                           | -6.35921          | SO <sub>3</sub>                                                | -6.1372           | BaSeO <sub>4</sub>                                 | -6.20327          |
| 32 | YAg <sub>2</sub>                                  | -3.58113          | Cu <sub>2</sub> O                                              | -3.95268          | BaS <sub>2</sub>                                   | -5.08926          |
| 33 | BaAg <sub>5</sub>                                 | -1.81549          | La <sub>2</sub> CuS <sub>4</sub>                               | -6.02146          | La <sub>2</sub> O <sub>3</sub>                     | -8.7395           |
| 34 | YCuS <sub>2</sub>                                 | -6.01493          | La <sub>2</sub> SO <sub>2</sub>                                | -8.31701          | ScAg                                               | -4.29051          |
| 35 | YSe                                               | -7.18956          | In <sub>3</sub> Cu <sub>7</sub>                                | -2.75803          | ScCuO <sub>2</sub>                                 | -7.34865          |
| 36 | Cu <sub>7</sub> S <sub>4</sub>                    | -3.5266           | S <sub>8</sub> O                                               | -4.61868          | In <sub>5</sub> AgSe <sub>8</sub>                  | -3.85558          |
| 37 | LaCu                                              | -4.04102          | BaYCuS <sub>3</sub>                                            | -5.90815          | InCuSe <sub>2</sub>                                | -3.78007          |
| 38 | In <sub>2</sub> S <sub>3</sub>                    | -4.40103          | Ag <sub>2</sub> SO <sub>4</sub>                                | -5.08389          | InAg <sub>3</sub>                                  | -2.01434          |
| 39 | ScAg <sub>4</sub>                                 | -2.76475          | LaSe <sub>2</sub>                                              | -6.14021          | InAgS <sub>2</sub>                                 | -3.82866          |
| 40 | BaSO <sub>4</sub>                                 | -6.88254          | InCuS <sub>2</sub>                                             | -4.13963          | Ag <sub>2</sub> O                                  | -2.95711          |
| 41 | CuSe                                              | -3.07064          | InAgO <sub>2</sub>                                             | -4.8634           | AgO                                                | -3.51608          |
| 42 | YCu <sub>5</sub>                                  | -3.42332          | ScCuS <sub>2</sub>                                             | -5.87132          | BaSeO <sub>3</sub>                                 | -6.26115          |
| 43 | La <sub>4</sub> Se <sub>3</sub> O <sub>4</sub>    | -7.79831          | In <sub>2</sub> (Se <sub>2</sub> O <sub>5</sub> ) <sub>3</sub> | -5.63275          | LaCu <sub>6</sub>                                  | -3.06584          |
| 44 | BaAg <sub>2</sub>                                 | -2.00915          | BaIn                                                           | -3.02891          | La(CuO <sub>2</sub> ) <sub>2</sub>                 | -6.14583          |
| 45 | InAgSe <sub>2</sub>                               | -3.50654          | La <sub>10</sub> Se <sub>14</sub> O                            | -6.66596          | Cu <sub>3</sub> Se <sub>2</sub>                    | -3.29692          |
| 46 | Ag <sub>2</sub> SeO <sub>3</sub>                  | -4.39893          | YCu <sub>2</sub>                                               | -4.18365          | Y(CuO <sub>2</sub> ) <sub>2</sub>                  | -6.46098          |
| 47 | BaSc <sub>2</sub> O <sub>4</sub>                  | -8.53885          | CuSO <sub>4</sub>                                              | -5.76258          | BaY <sub>2</sub> O <sub>4</sub>                    | -8.59603          |
| 48 | YAg                                               | -4.44208          | Sc <sub>2</sub> O <sub>3</sub>                                 | -9.39222          | BaAg                                               | -2.07645          |
| 49 | LaCuSO                                            | -6.54693          | CuSe <sub>2</sub>                                              | -3.5552           | Ba(YSe <sub>2</sub> ) <sub>2</sub>                 | -6.45466          |
| 50 | ScAg <sub>2</sub>                                 | -3.49669          | La <sub>2</sub> (SeO <sub>3</sub> ) <sub>3</sub>               | -6.876            | YCu                                                | -4.87659          |
| 51 | Sc                                                | -6.60553          | BaSc <sub>3</sub> AgS <sub>6</sub>                             | -6.33319          | La <sub>2</sub> CuO <sub>4</sub>                   | -7.50879          |
| 52 | BaO <sub>2</sub>                                  | -6.10381          | La <sub>10</sub> Se <sub>19</sub>                              | -6.20415          | BaS                                                | -5.35968          |
| 53 | LaAg                                              | -3.61635          | YAgO <sub>2</sub>                                              | -7.06044          | Ba(CuO) <sub>2</sub>                               | -4.94118          |
| 54 | InSe                                              | -3.89542          | BaS <sub>4</sub> O <sub>13</sub>                               | -6.42946          | Ba                                                 | -2.14891          |
| 55 | Y <sub>2</sub> SO <sub>2</sub>                    | -8.9782           | SO <sub>2</sub>                                                | -5.99127          | BaSe <sub>2</sub> O <sub>5</sub>                   | -6.00657          |
| 56 | YS                                                | -7.73259          | BaLaAgSe <sub>3</sub>                                          | -5.06875          |                                                    |                   |
| 57 | La <sub>2</sub> S <sub>3</sub>                    | -7.00169          | SeO <sub>2</sub>                                               | -5.48985          |                                                    |                   |

Table S1. List of competing phases used to calculate energy above hull for each of the target phases.

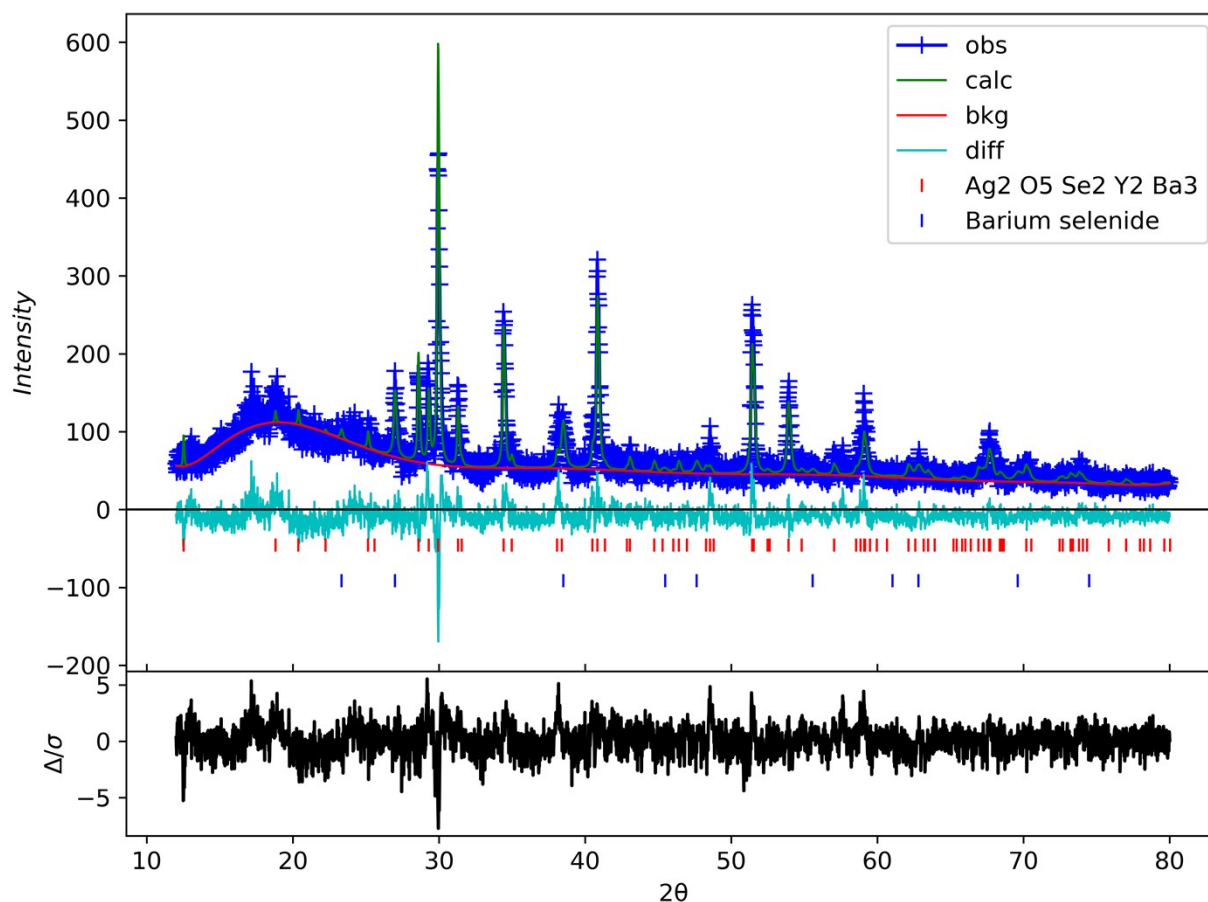

Figure S1. Diffraction pattern of the re-attempted synthesis of  $\text{Ba}_3\text{Y}_2\text{O}_5\text{Ag}_2\text{Se}_2$ , previously reported by Ogino et al. Pattern collected over 10 mins, longer scan times lead to appearance of degradation products due to air exposure. Data of insufficient quality to allow for refinement of structural parameters. However, a simplified Rietveld refinement was conducted, assuming the atomic positions matched those found in homologous  $\text{Ba}_3\text{Y}_2\text{O}_5\text{Cu}_2\text{Se}_2$ . This refinement confirmed the lattice parameters for  $\text{Ba}_3\text{Y}_2\text{O}_5\text{Ag}_2\text{Se}_2$  as  $a = 4.42 \text{ \AA}$  and  $c = 28.38 \text{ \AA}$ .

| Bond or Angle                          | $\text{Ba}_3\text{Sc}_2\text{O}_5\text{Cu}_2\text{Se}_2$ | $\text{Ba}_3\text{Sc}_2\text{O}_5\text{Ag}_2\text{Se}_2$ | $\text{Ba}_3\text{In}_2\text{O}_5\text{Ag}_2\text{Se}_2$ | $\text{Ba}_3\text{Y}_2\text{O}_5\text{Cu}_2\text{Se}_2$ |
|----------------------------------------|----------------------------------------------------------|----------------------------------------------------------|----------------------------------------------------------|---------------------------------------------------------|
| O-Ba-Ch angle / °                      | 78.7(5)                                                  | 77.4(2)                                                  | 76.8(2)                                                  | 74.6(9)                                                 |
| M-Ch Bond / Å                          | 3.503(34)                                                | 3.409(10)                                                | 3.413(4)                                                 | 3.396(25)                                               |
| Ba-Ba distance, Oxide Block height / Å | 7.892(5)                                                 | 7.837(6)                                                 | 7.990(4)                                                 | 8.032(24)                                               |
| M-O equatorial bond / Å                | 2.107(2)                                                 | 2.123(2)                                                 | 2.147(2)                                                 | 2.220(80)                                               |
| M-O axial bond / Å                     | 1.990(8)                                                 | 1.993(8)                                                 | 2.051(2)                                                 | 2.105(16)                                               |
| Ch Block height / Å                    | 2.872(35)                                                | 3.528(6)                                                 | 3.512(4)                                                 | 2.735(19)                                               |
| Ch-M'-Ch Angle / °                     | 111.0(1)                                                 | 100.2(1)                                                 | 101.0(1)                                                 | 116.2(6)                                                |
| M'-Ch bond length / Å                  | 2.536(2)                                                 | 2.749(3)                                                 | 2.760(2)                                                 | 2.586(10)                                               |

Table S2. Selected bond distances and angles derived from Rietveld refinement to X-ray powder diffraction patterns.  $M = \text{Sc, In or Y}$ ;  $M' = \text{Cu or Ag}$ ;  $Ch = \text{S or Se}$ . Also included are the heights of the chalcogenide and oxide blocks. Errors are two sigma.

|                                                                                      | $E_{\text{hull}}$<br>(meV/atom) | a (= b)<br>(Å) | c (Å) | $\alpha, \beta, \gamma$<br>(°) | Vol. (Å <sup>3</sup> ) | M-Ch-M<br>(°) | Ba-Ba<br>(Å) | Ba-O (Å)         | M-O (Å)    | Decomposes to                                                                                                 |
|--------------------------------------------------------------------------------------|---------------------------------|----------------|-------|--------------------------------|------------------------|---------------|--------------|------------------|------------|---------------------------------------------------------------------------------------------------------------|
| [Cu <sub>2</sub> S <sub>2</sub> ][Ba <sub>3</sub> Sc <sub>2</sub> O <sub>5</sub> ]*  | 0                               | 4.12           | 26.92 | 90                             | 457.76                 | 117.49        | 7.94         | 2.68, 2.92, 3.06 | 1.98, 2.08 |                                                                                                               |
| [Cu <sub>2</sub> S <sub>2</sub> ][Ba <sub>3</sub> In <sub>2</sub> O <sub>5</sub> ]*  | 0                               | 4.18           | 27.19 | 90                             | 476.06                 | 119.62        | 8.13         | 2.69, 2.96, 3.16 | 2.08, 2.11 |                                                                                                               |
| [Cu <sub>2</sub> S <sub>2</sub> ][Ba <sub>3</sub> Y <sub>2</sub> O <sub>5</sub> ]*   | 46.2                            | 4.34           | 26.48 | 90                             | 498.31                 | 124.55        | 8.06         | 2.70, 3.07, 3.25 | 2.13, 2.19 | BaY <sub>2</sub> O <sub>4</sub> , BaSO <sub>4</sub> , BaS, Cu                                                 |
| [Cu <sub>2</sub> S <sub>2</sub> ][Ba <sub>3</sub> La <sub>2</sub> O <sub>5</sub> ]*  | 131.6                           | 4.49           | 27.18 | 90                             | 547.9                  | 130.68        | 8.61         | 2.73, 3.17       | 2.28, 2.32 | BaO, BaSO <sub>4</sub> , BaS, La <sub>2</sub> O <sub>3</sub> , Cu                                             |
| [Cu <sub>2</sub> Se <sub>2</sub> ][Ba <sub>3</sub> Sc <sub>2</sub> O <sub>5</sub> ]  | 0                               | 4.16           | 27.49 | 90                             | 476.5                  | 112.99        | 7.88         | 2.69, 2.94, 3.06 | 1.97, 2.10 |                                                                                                               |
| [Cu <sub>2</sub> Se <sub>2</sub> ][Ba <sub>3</sub> In <sub>2</sub> O <sub>5</sub> ]* | 0                               | 4.20           | 27.73 | 90                             | 494.95                 | 114.91        | 8.04         | 2.70, 2.99, 3.16 | 2.07, 2.13 |                                                                                                               |
| [Cu <sub>2</sub> Se <sub>2</sub> ][Ba <sub>3</sub> Y <sub>2</sub> O <sub>5</sub> ]   | 0                               | 4.36           | 27.20 | 90                             | 518.14                 | 119.12        | 8.03         | 2.71, 3.09, 3.25 | 2.12, 2.20 |                                                                                                               |
| [Cu <sub>2</sub> Se <sub>2</sub> ][Ba <sub>3</sub> La <sub>2</sub> O <sub>5</sub> ]  | 76.3                            | 4.52           | 27.80 | 90                             | 567.94                 | 124.8         | 8.55         | 2.75, 3.2        | 2.30, 2.31 | BaCu <sub>2</sub> O <sub>2</sub> , BaSe, La <sub>2</sub> O <sub>3</sub>                                       |
| [Ag <sub>2</sub> S <sub>2</sub> ][Ba <sub>3</sub> Sc <sub>2</sub> O <sub>5</sub> ]   | 2.1                             | 4.17           | 27.75 | 90                             | 482.39                 | 104.91        | 7.85         | 2.69, 2.95, 3.05 | 1.97, 2.10 | BaSc <sub>2</sub> O <sub>4</sub> , BaSO <sub>4</sub> , BaS, Ag                                                |
| [Ag <sub>2</sub> S <sub>2</sub> ][Ba <sub>3</sub> In <sub>2</sub> O <sub>5</sub> ]   | 8.5                             | 4.23           | 27.96 | 90                             | 499.82                 | 106.96        | 8.03         | 2.70, 2.99, 3.16 | 2.08, 2.13 | Ba <sub>2</sub> In <sub>2</sub> O <sub>5</sub> , BaS, In <sub>2</sub> O <sub>3</sub> , BaSO <sub>4</sub> , Ag |
| [Ag <sub>2</sub> S <sub>2</sub> ][Ba <sub>3</sub> Y <sub>2</sub> O <sub>5</sub> ]    | 45.7                            | 4.37           | 27.36 | 90                             | 523.64                 | 111.64        | 7.98         | 2.71, 3.09, 3.24 | 2.13, 2.20 | BaY <sub>2</sub> O <sub>4</sub> , BaSO <sub>4</sub> , BaS, Ag                                                 |
| [Ag <sub>2</sub> S <sub>2</sub> ][Ba <sub>3</sub> La <sub>2</sub> O <sub>5</sub> ]   | 120.5                           | 4.54           | 27.91 | 90                             | 575.75                 | 117.62        | 8.45         | 2.75, 3.21       | 2.30, 2.30 | BaO, BaSO <sub>4</sub> , BaS, La <sub>2</sub> O <sub>3</sub> , Ag                                             |
| [Ag <sub>2</sub> Se <sub>2</sub> ][Ba <sub>3</sub> Sc <sub>2</sub> O <sub>5</sub> ]  | 0                               | 4.20           | 28.43 | 90                             | 501.88                 | 101.64        | 7.81         | 2.69, 2.97, 3.06 | 1.97, 2.12 |                                                                                                               |
| [Ag <sub>2</sub> Se <sub>2</sub> ][Ba <sub>3</sub> In <sub>2</sub> O <sub>5</sub> ]  | 0                               | 4.26           | 28.59 | 90                             | 519.51                 | 103.56        | 7.97         | 2.70, 3.01, 3.15 | 2.07, 2.15 |                                                                                                               |
| [Ag <sub>2</sub> Se <sub>2</sub> ][Ba <sub>3</sub> Y <sub>2</sub> O <sub>5</sub> ]   | 0                               | 4.40           | 28.16 | 90                             | 544.42                 | 107.65        | 7.98         | 2.72, 3.11, 3.24 | 2.12, 2.21 |                                                                                                               |
| [Ag <sub>2</sub> Se <sub>2</sub> ][Ba <sub>3</sub> La <sub>2</sub> O <sub>5</sub> ]  | 54.7                            | 4.56           | 28.71 | 90                             | 596.77                 | 112.77        | 8.47         | 2.77, 3.22       | 2.29, 2.31 | BaO, BaSeO <sub>3</sub> , BaSe, La <sub>2</sub> O <sub>3</sub> , Ag                                           |

Table S3 Energy above the convex hull of the compositional phase diagram, cell lattice parameters, atomic distances and angles calculated for each compound using the PBEsol functional. \* Results for these compounds are in agreement with previously reported values and are recalculated and included here for completeness.

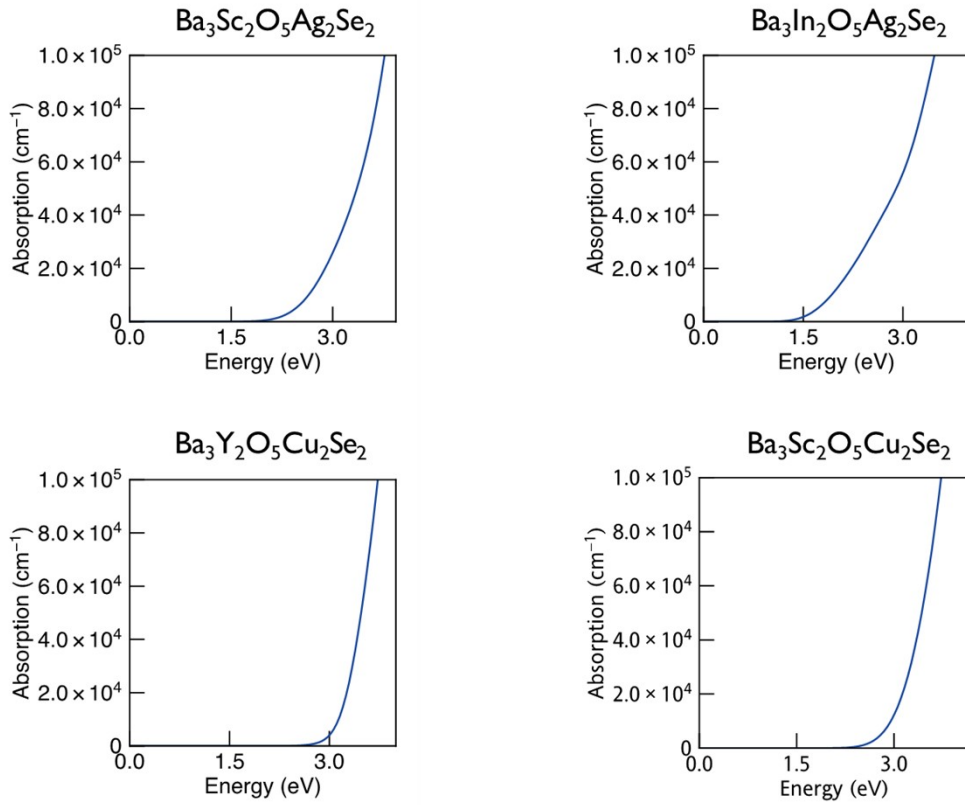

Figure S2. Optical absorption plots calculated using the real and imaginary parts of the dielectric constant calculated through a Kramers-Kronig transformation and a summation over the unoccupied bands, respectively.

| Attempted Composition                                                          | Chi <sup>2</sup> | Actual composition                        |                 |               |                              |                                                          |  |
|--------------------------------------------------------------------------------|------------------|-------------------------------------------|-----------------|---------------|------------------------------|----------------------------------------------------------|--|
| Ba <sub>3</sub> Y <sub>2</sub> O <sub>5</sub> Cu <sub>2</sub> S <sub>2</sub>   | 1.49             | Y <sub>2</sub> O <sub>3</sub><br>(22.4%)  | BaS<br>(31.7%)  | Cu<br>(17.0%) | BaSO <sub>4</sub><br>(11.4%) | BaYO <sub>4</sub><br>(17.5%)                             |  |
| Ba <sub>3</sub> La <sub>2</sub> O <sub>5</sub> Cu <sub>2</sub> S <sub>2</sub>  | 1.14             | La <sub>2</sub> O <sub>3</sub><br>(33.6%) | BaS<br>(28.2%)  | Cu<br>(21.8%) | BaSO <sub>4</sub><br>(9.7%)  | BaCO <sub>3</sub><br>(6.6%)                              |  |
| Ba <sub>3</sub> La <sub>2</sub> O <sub>5</sub> Cu <sub>2</sub> Se <sub>2</sub> | 1.69             | La <sub>2</sub> O <sub>3</sub><br>(34.9%) | BaSe<br>(26.4%) | Cu<br>(38.7%) |                              |                                                          |  |
| Ba <sub>3</sub> La <sub>2</sub> O <sub>5</sub> Ag <sub>2</sub> Se <sub>2</sub> | 1.39             | La <sub>2</sub> O <sub>3</sub><br>(30.6%) | BaSe<br>(55.9%) | Ag<br>(11.9%) | BaCO <sub>3</sub><br>(3.3%)  |                                                          |  |
| Ba <sub>3</sub> Sc <sub>2</sub> O <sub>5</sub> Ag <sub>2</sub> S <sub>2</sub>  | 1.81             | Sc <sub>2</sub> O <sub>3</sub><br>(20.7%) | BaS<br>(49.0%)  | Ag<br>(15.5%) | BaSO <sub>4</sub><br>(14.7%) |                                                          |  |
| Ba <sub>3</sub> In <sub>2</sub> O <sub>5</sub> Ag <sub>2</sub> S <sub>2</sub>  | 1.23             | In <sub>2</sub> O <sub>3</sub><br>(31.1%) | BaS<br>(31.4%)  | Ag<br>(10.7%) | BaSO <sub>4</sub><br>(21.2%) | Ba <sub>2</sub> In <sub>2</sub> O <sub>5</sub><br>(5.5%) |  |
| Ba <sub>3</sub> Y <sub>2</sub> O <sub>5</sub> Ag <sub>2</sub> S <sub>2</sub>   | 1.21             | Y <sub>2</sub> O <sub>3</sub><br>(37.6%)  | BaS<br>(37.3%)  | Ag<br>(11.9%) | BaSO <sub>4</sub><br>(13.2%) |                                                          |  |
| Ba <sub>3</sub> La <sub>2</sub> O <sub>5</sub> Ag <sub>2</sub> S <sub>2</sub>  | 1.2              | La <sub>2</sub> O <sub>3</sub><br>(38.0%) | BaS<br>(38.8%)  | Ag<br>(13.5%) | BaSO <sub>4</sub><br>(9.6%)  |                                                          |  |

Table S4: Details of the refinement of the attempted compounds which could not be synthesized, and resultant composition, with Weight% of phases identified from Rietveld Refinement.

| Formula                                                                        | $\Gamma$ -N / $m_e$ | $\Gamma$ -X / $m_e$ |
|--------------------------------------------------------------------------------|---------------------|---------------------|
| Ba <sub>3</sub> Y <sub>2</sub> O <sub>5</sub> Cu <sub>2</sub> Se <sub>2</sub>  | 0.46                | 0.5                 |
| Ba <sub>3</sub> Sc <sub>2</sub> O <sub>5</sub> Cu <sub>2</sub> Se <sub>2</sub> | N/A                 | 0.45                |
| Ba <sub>3</sub> Sc <sub>2</sub> O <sub>5</sub> Ag <sub>2</sub> Se <sub>2</sub> | 0.56                | 0.44                |
| Ba <sub>3</sub> In <sub>2</sub> O <sub>5</sub> Ag <sub>2</sub> Se <sub>2</sub> | 0.56                | 0.37                |

Table S5. Light hole effective masses for the newly reported compounds, broken down by reciprocal space direction. Appropriate Brillouin diagram can found at <https://www.cryst.ehu.es/cgi-bin/cryst/programs/nph-kv-list?qnum=139&fig=f4ommmiq&what=data>. *k*-point coordinates in reciprocal space are:

$\Gamma$ : 0.0 0.0 0.0;      Z: 0.5 0.5 -0.5;      N: 0.0 0.5 0.0;  
P: 0.25 0.25 0.25;      X: 0.0 0.0 0.5
